# Supplementary figures and images for: β-Cyclodextrin based polyurethane as eco-friendly polymeric phase transfer catalyst in nucleophilic substitution reactions of benzyl halides in water: An efficient route to synthesis of benzyl thiocyanates and acetates
Source: Royal Society of Chemistry journal article supplement (doi:10.1039/c2cy00375a), 2012-01-01

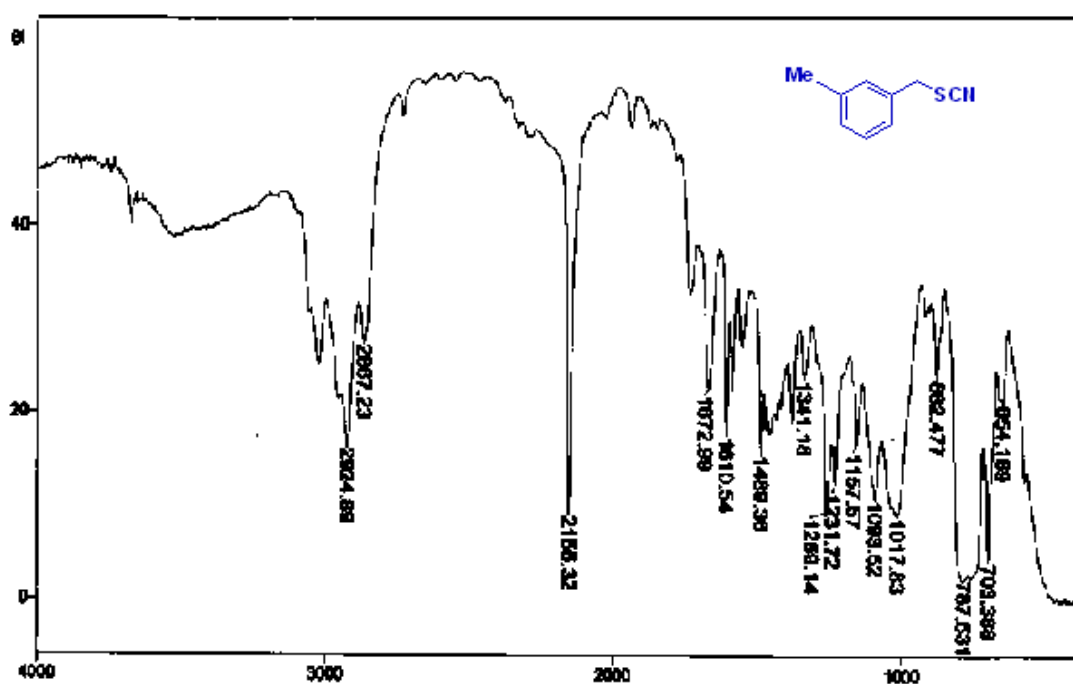

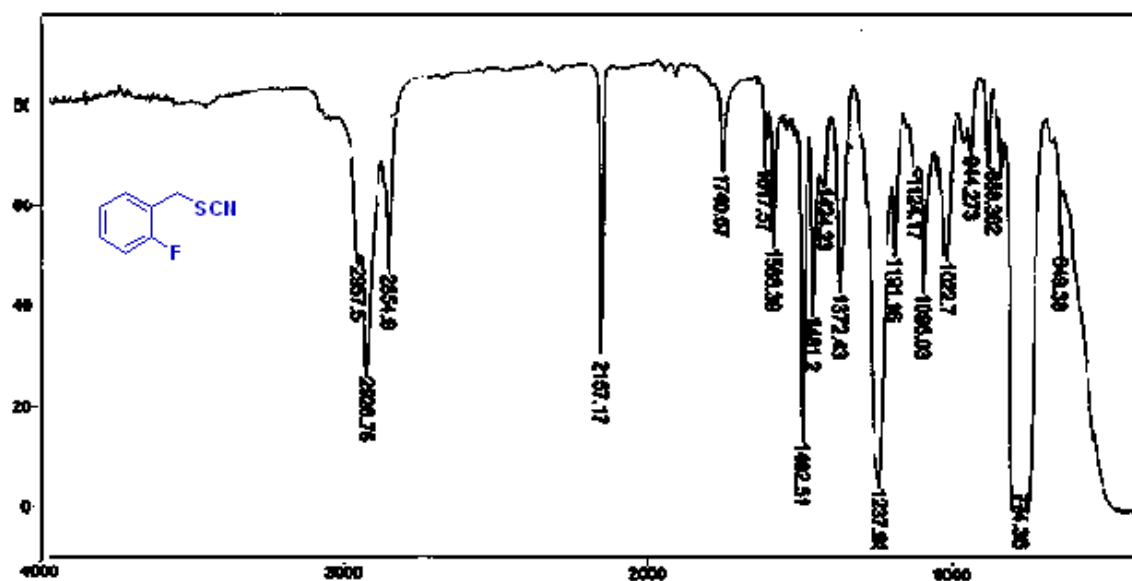

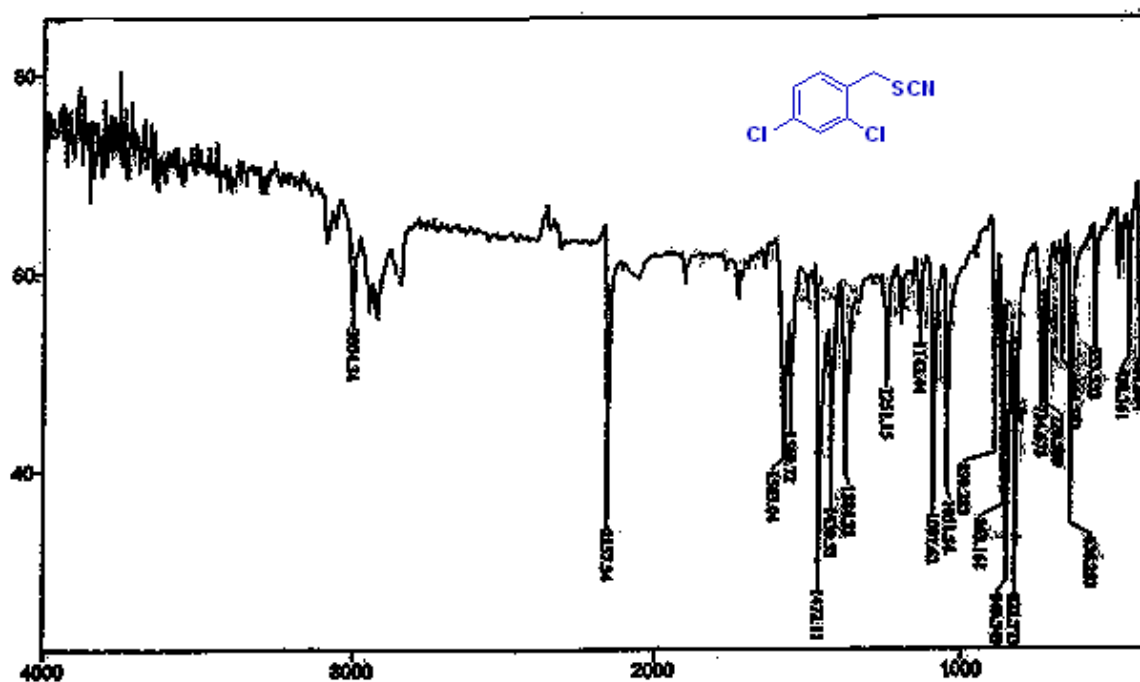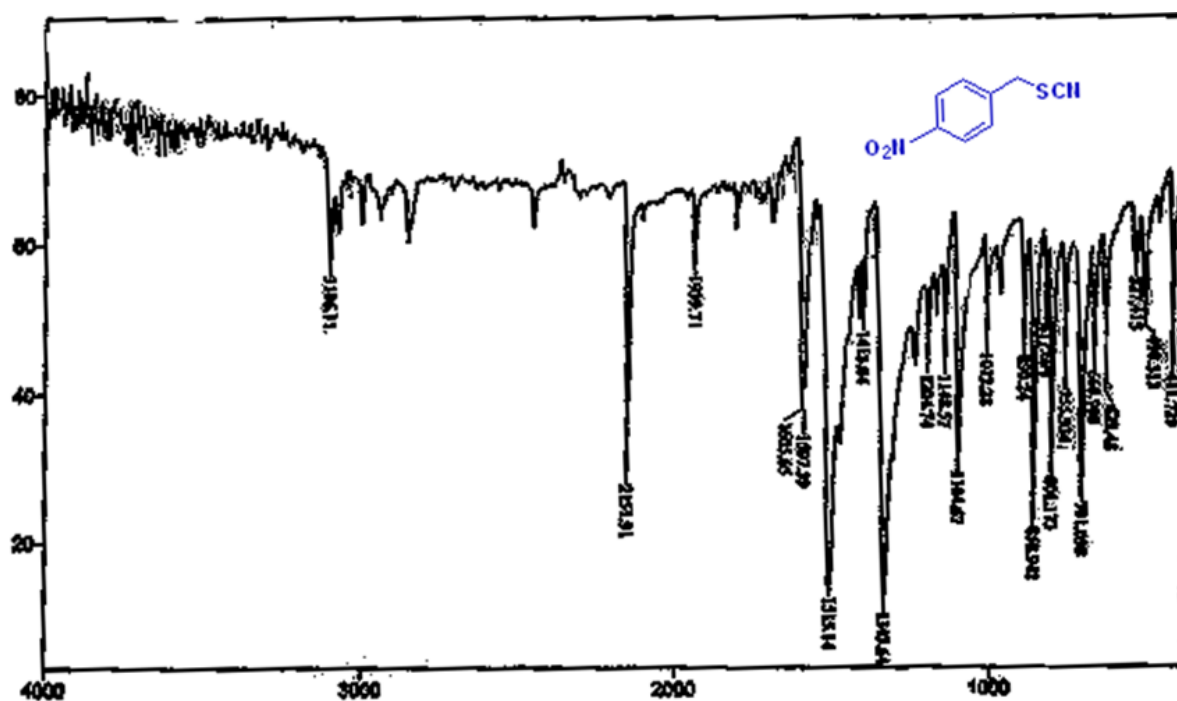

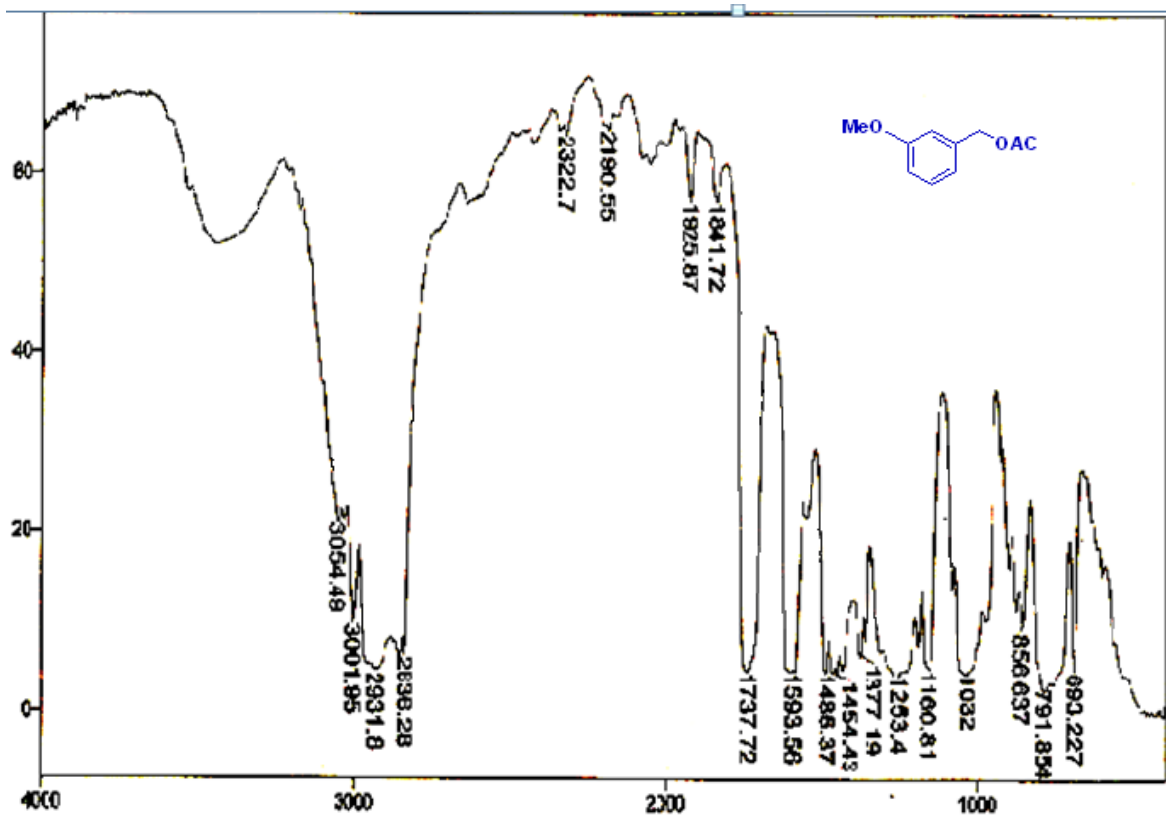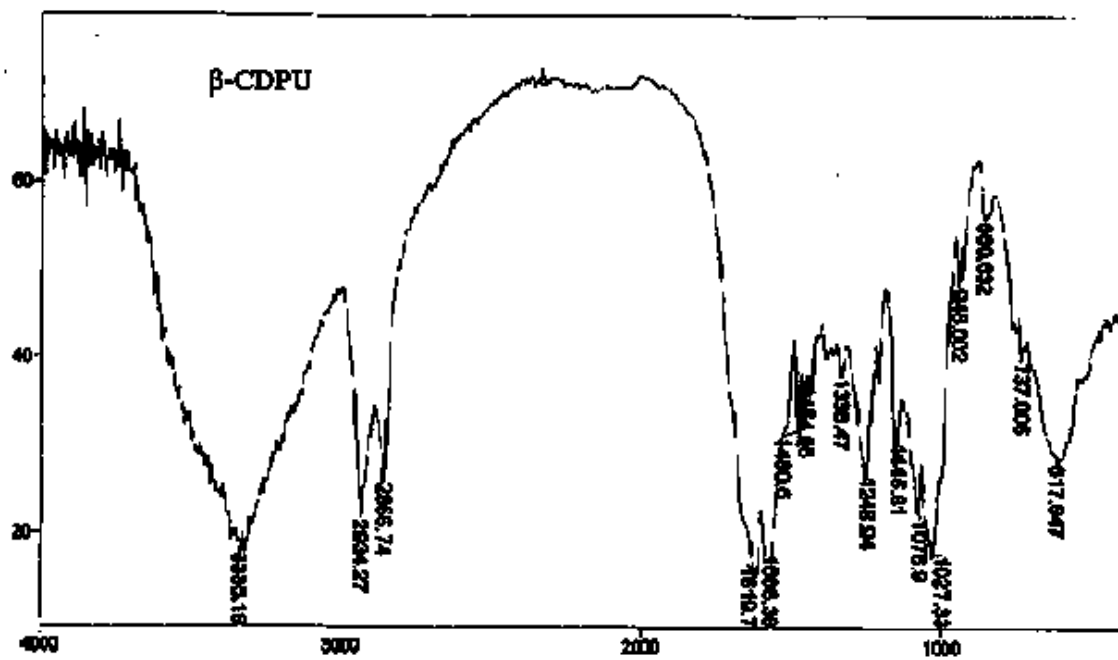

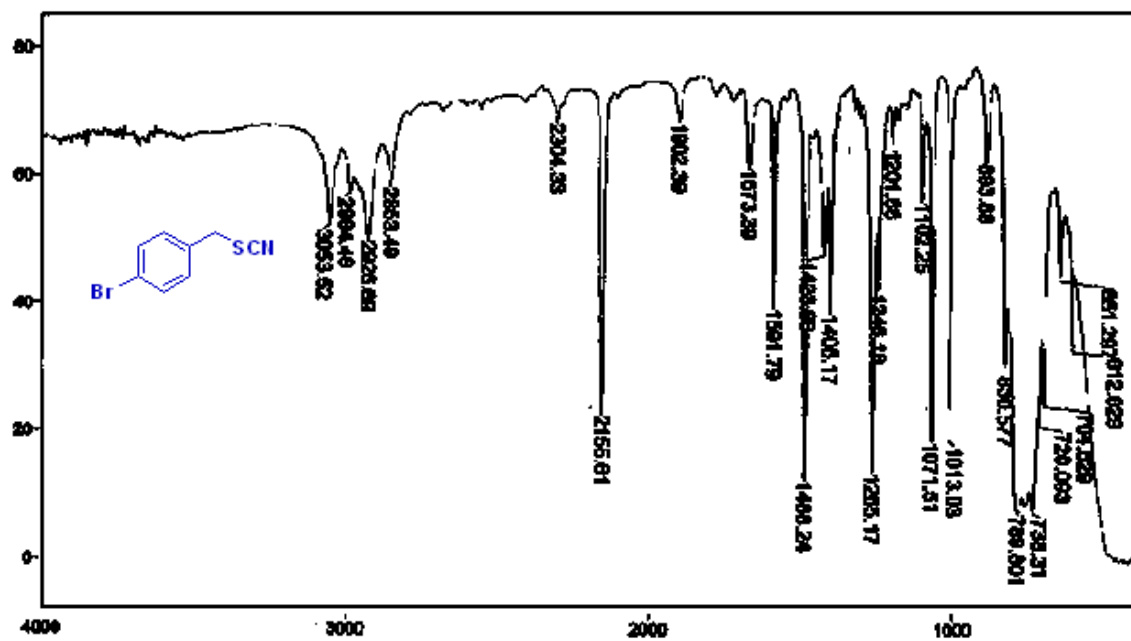

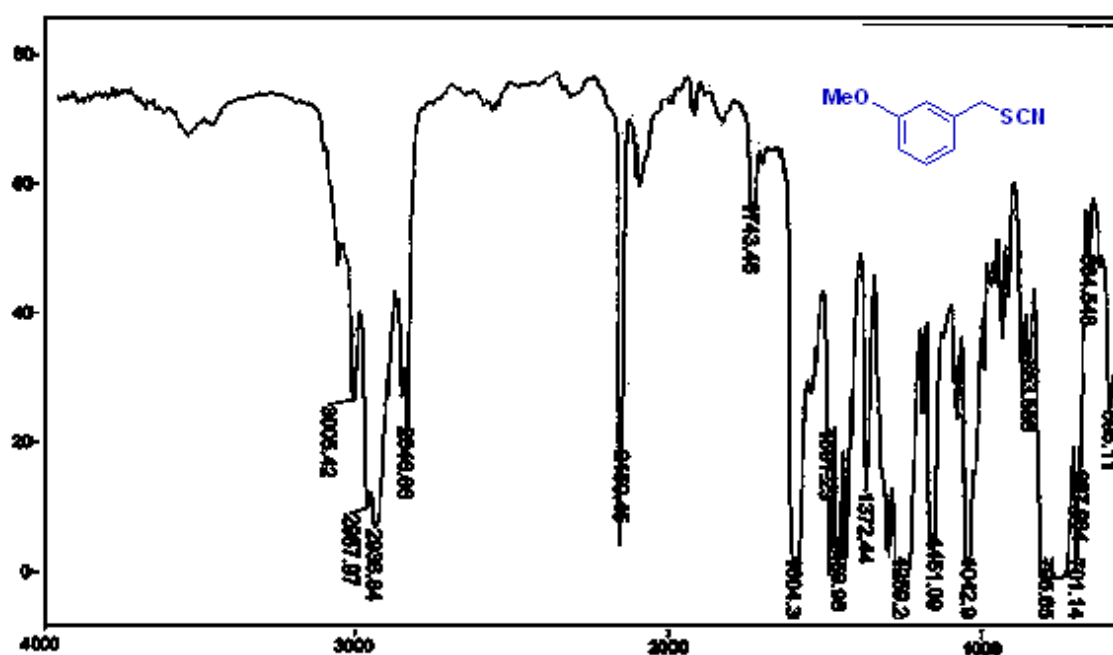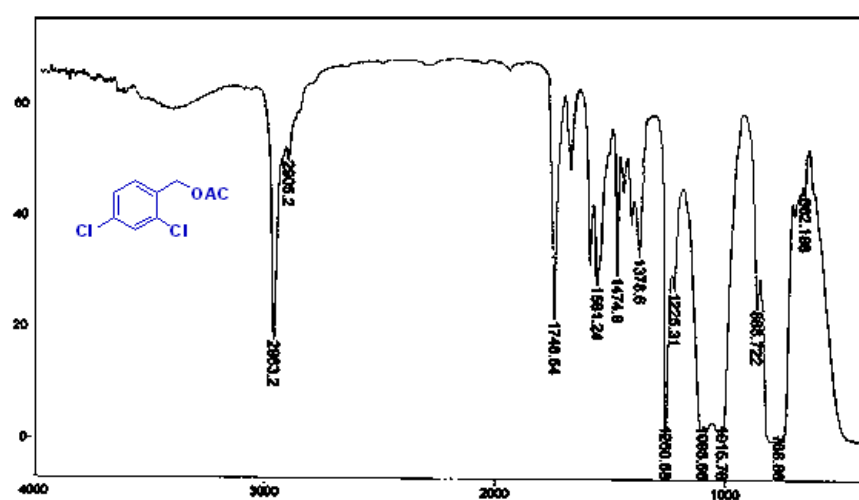

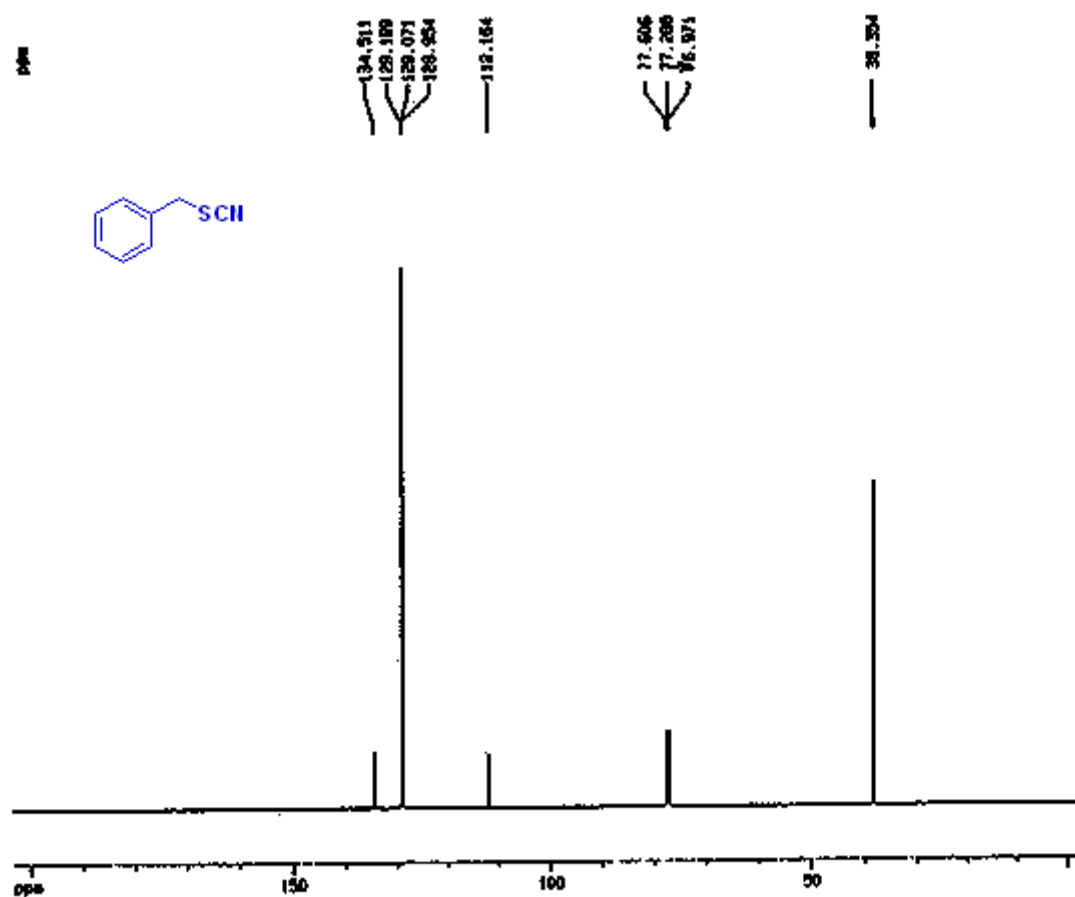

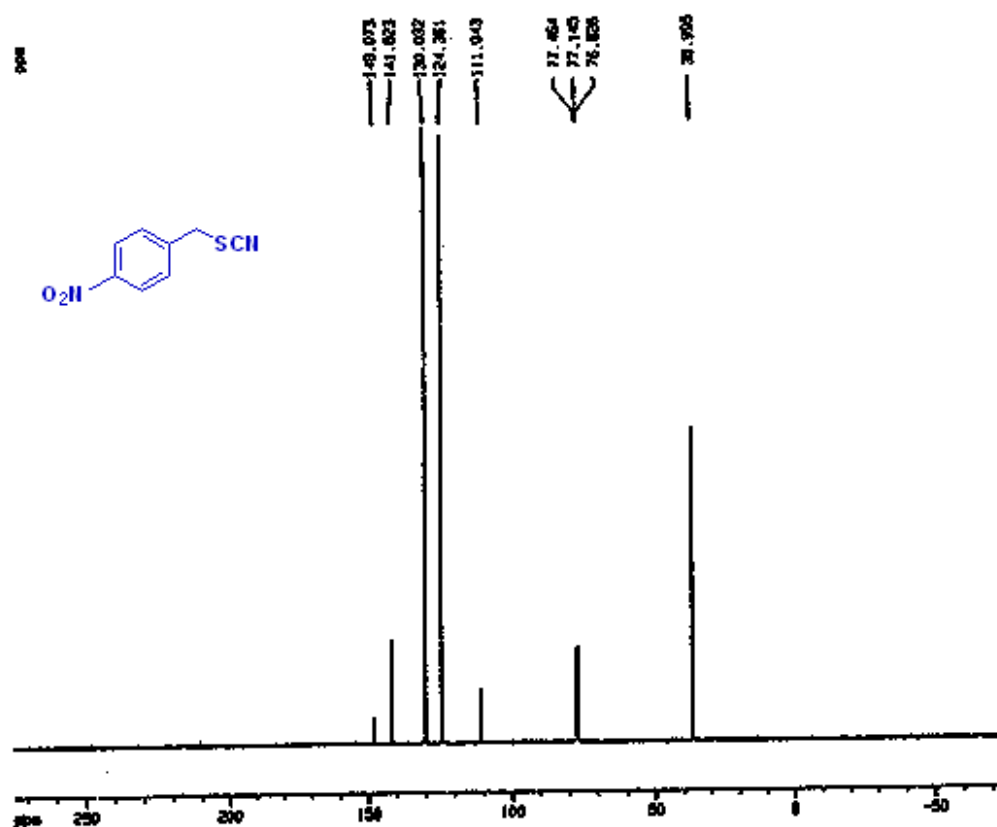



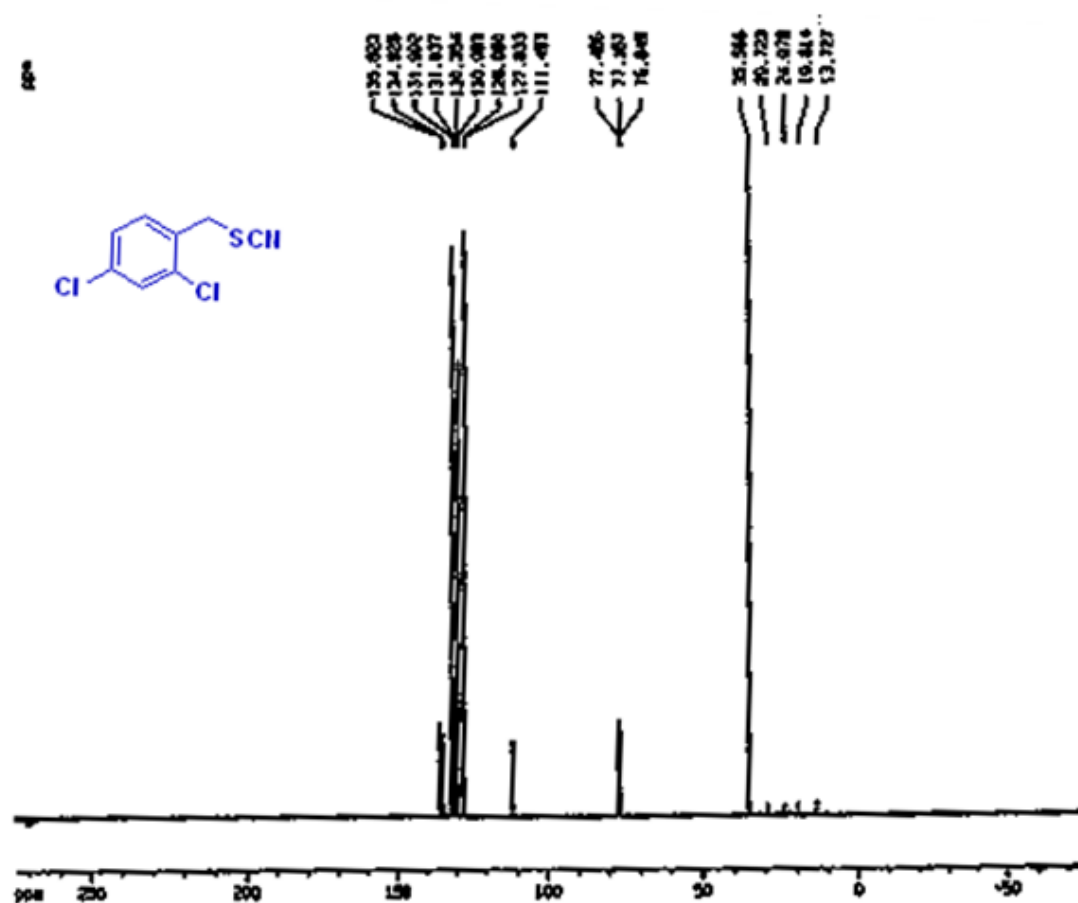

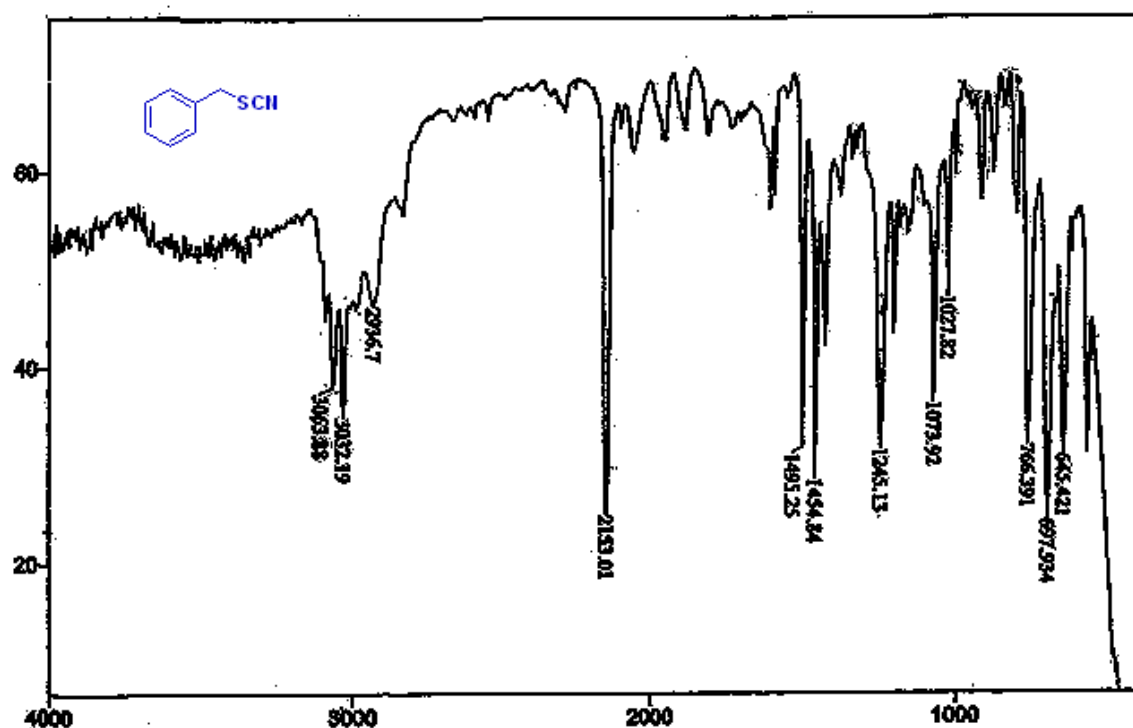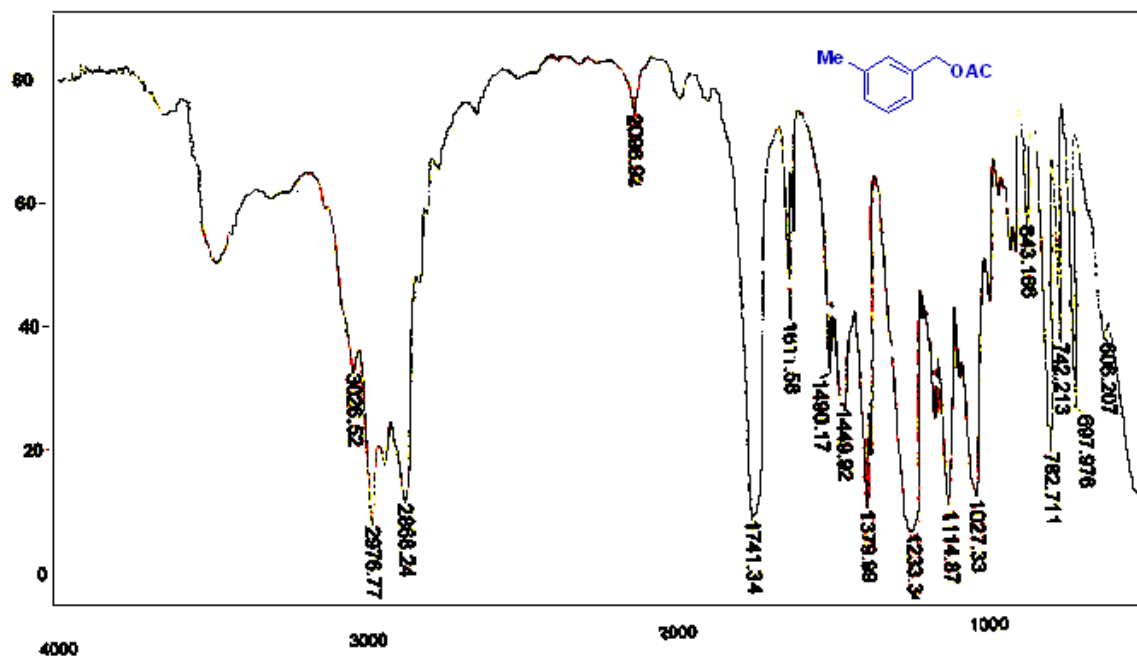

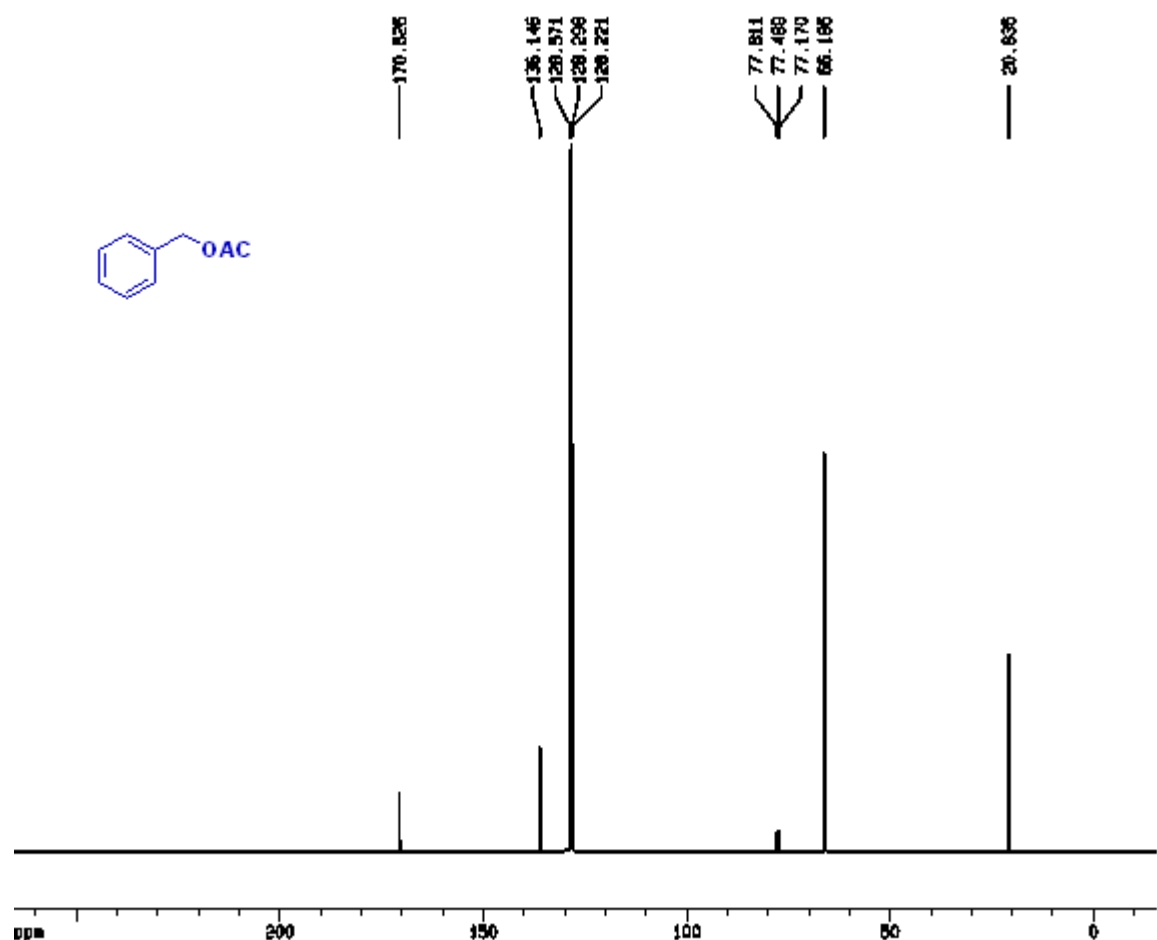

Supplement: c2cy00375a.pdf [file c2cy00375a.pdf]
